# Supplementary material for: Self-assembled lignin nanoparticles produced from elephant grass leaves enable selective inactivation of Gram-positive microorganisms
Source: Royal Society of Chemistry journal article supplement (doi:10.1039/d3su00400g), 2023-12-21
Supplement: d3su00400g1.pdf [file d3su00400g1.pdf]

## Supporting Information

# Self-assembled Lignin Nanoparticles produced from Elephant Grass Leaves enable Selective Inactivation of Gram-positive Microorganisms

*Isabella C. Tanganini<sup>†,‡</sup>, Camilla H. M. Camargos<sup>§</sup>, Jennifer C. Jackson<sup>†</sup>, Sandra R. Ceccato-Antonini<sup>^</sup>, Camila A. Rezende<sup>§</sup>, Andreia F. Faria<sup>\*,†</sup>*

<sup>†</sup>Engineering School of Sustainable Infrastructure & Environment, Department of Environmental Engineering Sciences, University of Florida, Gainesville, FL, 32611-6540, USA

<sup>‡</sup> Department of Agribusiness, Food and Nutrition, University of São Paulo – USP, Piracicaba, São Paulo, Brazil

<sup>§</sup> Departamento de Físico-Química, Instituto de Química, Universidade Estadual de Campinas (UNICAMP), P.O. Box 6154, 13083-970, Campinas, São Paulo, Brazil

<sup>\*</sup>School of Fine Arts, Federal University of Minas Gerais – UFMG, Belo Horizonte, MG, 31270-901, Brazil

<sup>^</sup>Department of Agroindustrial Technology and Rural Socioeconomics, Federal University of São Carlos – UFSCar, Araras, São Paulo, Brazil

\*Corresponding Author (E-mail: [andreia.faria@essie.ufl.edu](mailto:andreia.faria@essie.ufl.edu), Tel: 352-392-7104)

Supporting information contains 5 pages with 4 supplementary figures.

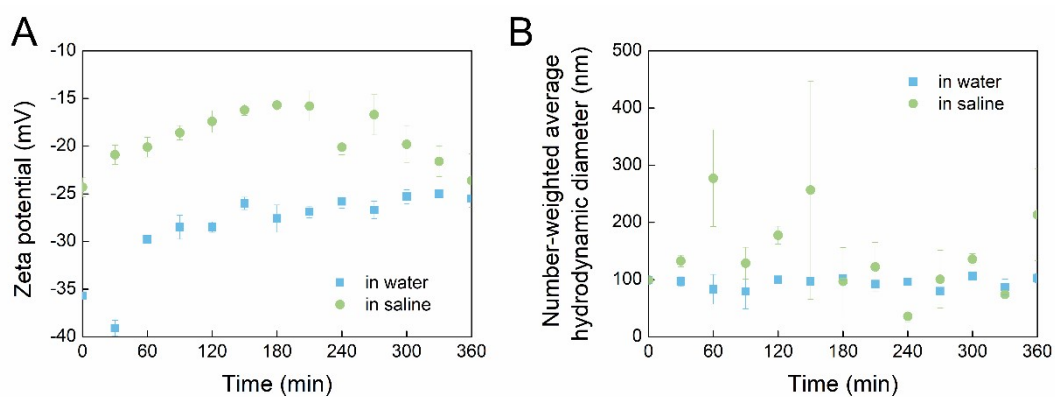

**Figure S1.** (A) Zeta potentials and (B) number-weighted average hydrodynamic diameters of SA-LNPs dispersed in deionized water or saline solution as a function of time. Measurements were taken over 6 h. Including all measurements, the mean zeta potentials were  $-28.5 \pm 4.3$  mV and  $-19.3 \pm 2.9$  mV, while the mean hydrodynamic diameters were  $94 \pm 9$  nm and  $142 \pm 71$  nm, respectively for SA-LNPs dispersed in water and saline.

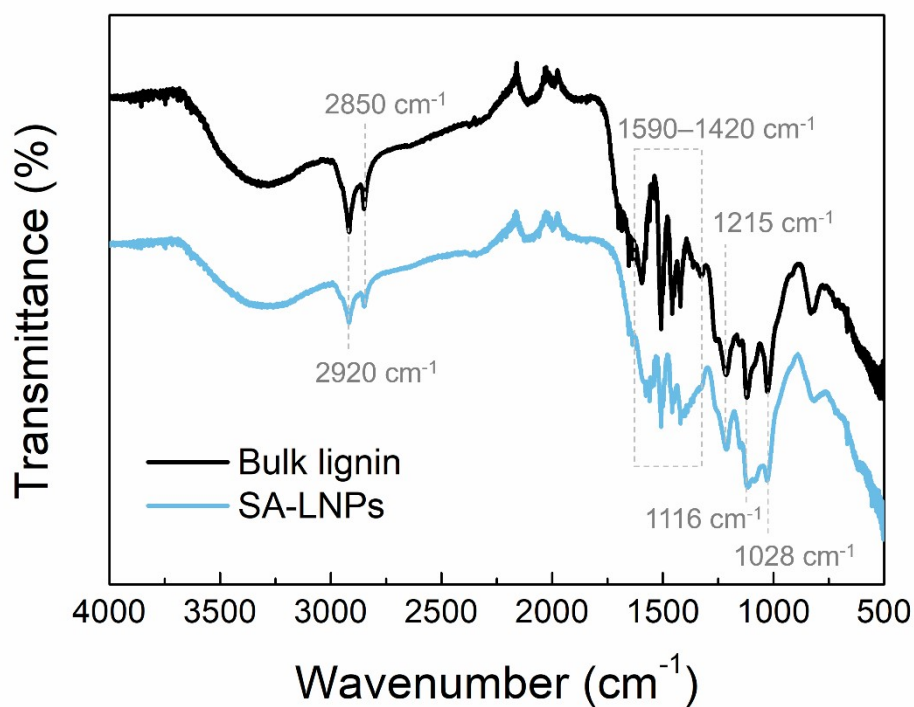

**Figure S2.** ATR-FTIR spectra of dried bulk alkaline lignin and SA-LNPs from elephant grass leaves. The absorption bands indicated by dotted lines are attributed to C–H stretching in methoxyl groups (2920 and 2850 cm<sup>-1</sup>); C=C stretching in aromatic rings (1420 to 1590 cm<sup>-1</sup>); C–O aryl-ether groups (1215 cm<sup>-1</sup>), C=O stretching (1116 cm<sup>-1</sup>), and aromatic C–H in-plane deformation (1028 cm<sup>-1</sup>).

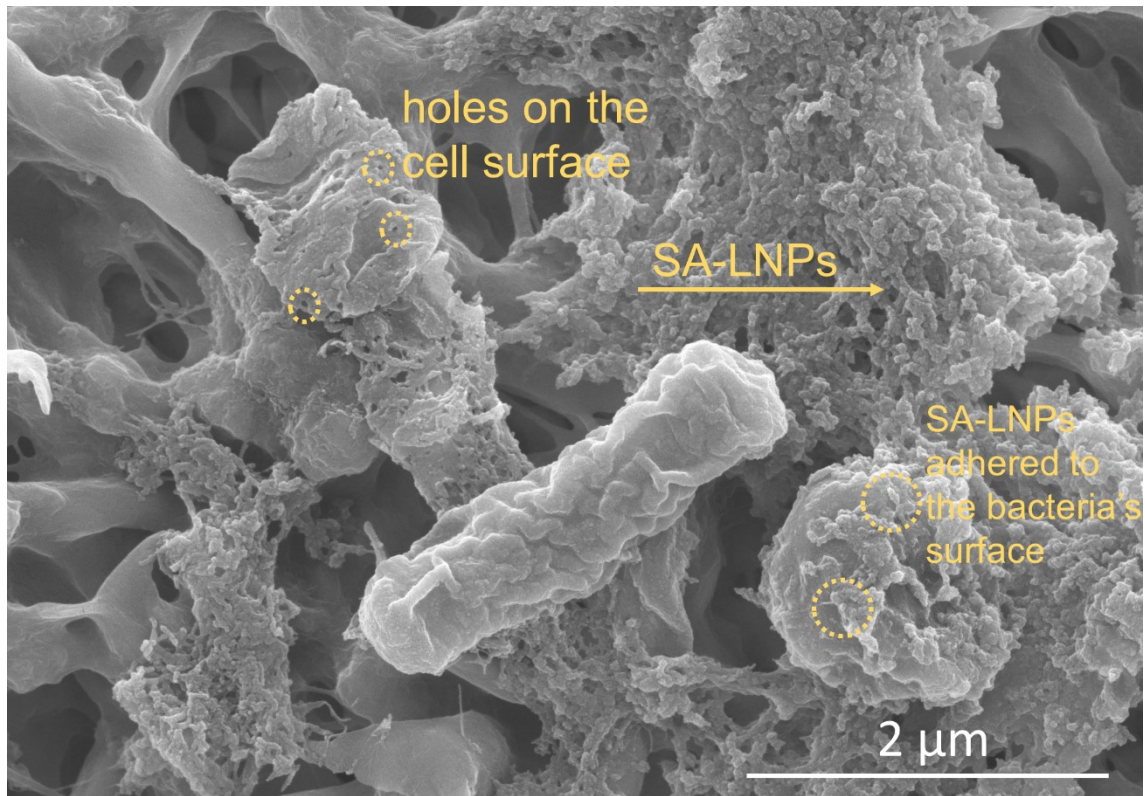

**Figure S3:** SEM image showing the formation of holes on the bacteria cell wall and adhesion of SA-LNPs on the surface of *L. fermentum* cells.

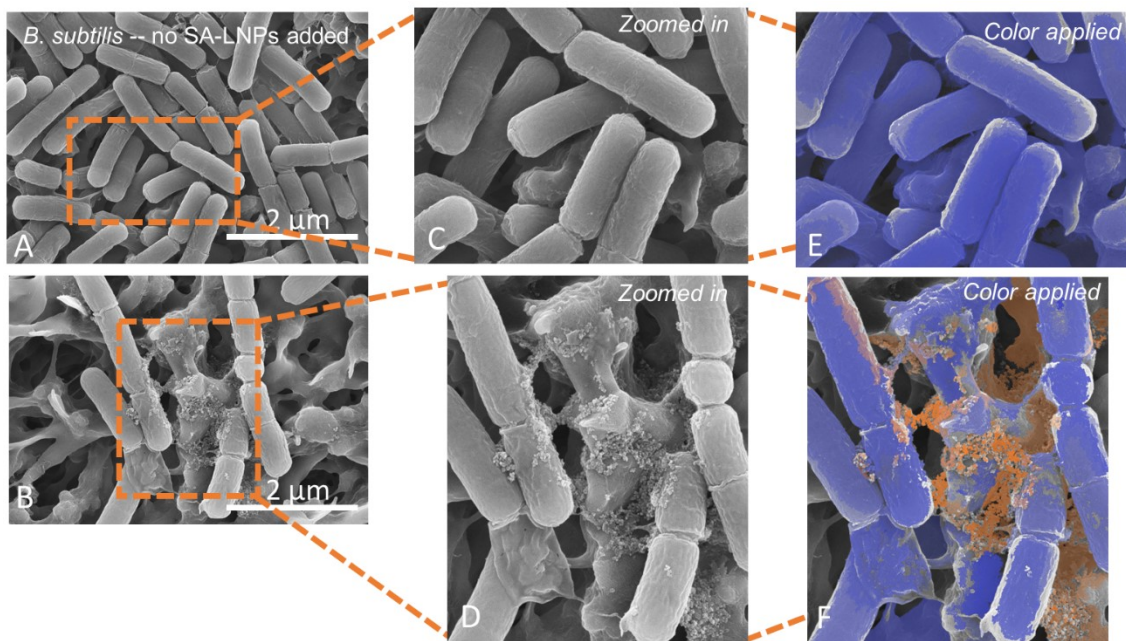

**Figure S4:** SEM images showing *B. subtilis* cells before (A) and after contact with SA-LNPs (B). Parts of the images were zoomed in (C and D) and color applied (E and F) to differentiate the cells in blue and the SA-LNPs in orange.

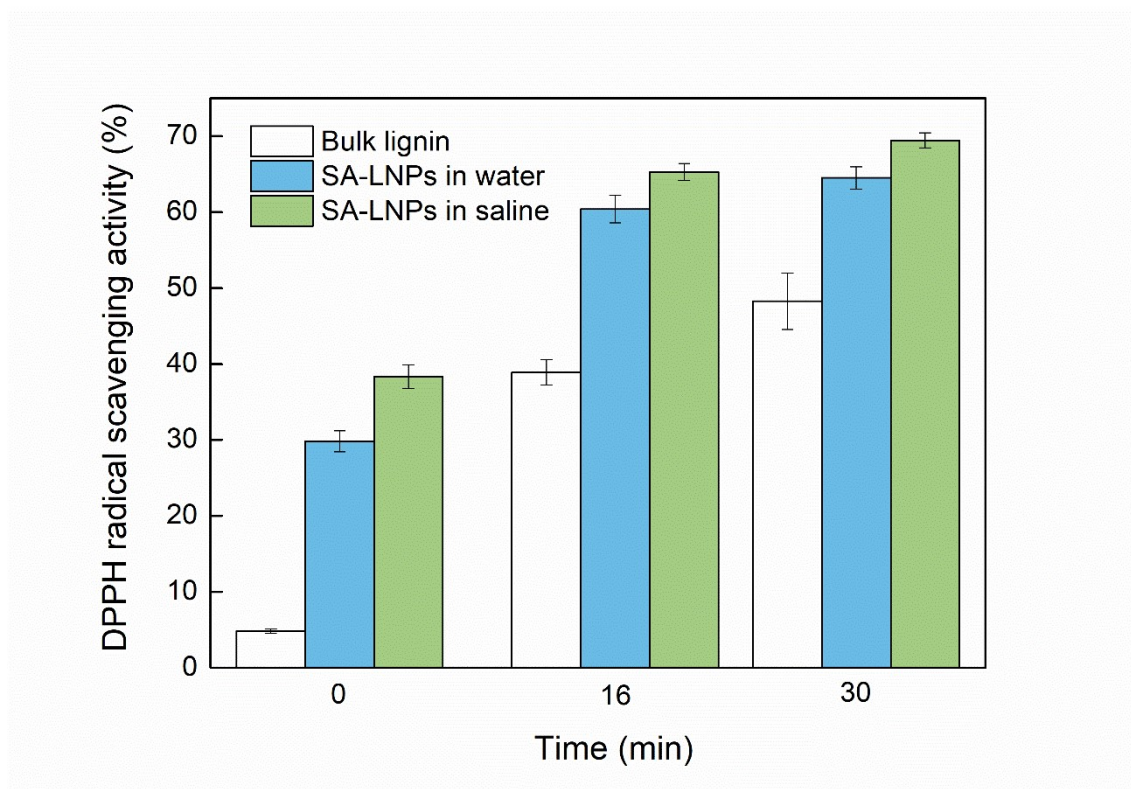

**Figure S5.** DPPH radical scavenging activity measured for bulk alkaline lignin dissolved in dioxane, SA-LNPs dispersed in deionized water, and SA-LNPs dispersed in saline solution. Antioxidant capacity assays were performed for 0, 16, and 30 min. After 30 min, the average scavenging activity was  $48.3 \pm 3.7\%$  for bulk lignin,  $64.5 \pm 1.7\%$  for SA-LNPs in water, and  $69.5 \pm 1.0$  for SA-LNPs in saline. Lignin and SA-LNPs were tested at  $50 \mu\text{g/mL}$ .
